# Supplementary material
Source: PubMed Central journal article supplement (PMC6663630)
Supplement: NIHMS1517522-supplement-Appendix_F1.pdf [file NIHMS1517522-supplement-Appendix_F1.pdf]

Appendix Figure 1: Regional Nursing Home Quality Measure Performance for Six Measures under Prescribing Clinician Control: Physician Subgroup

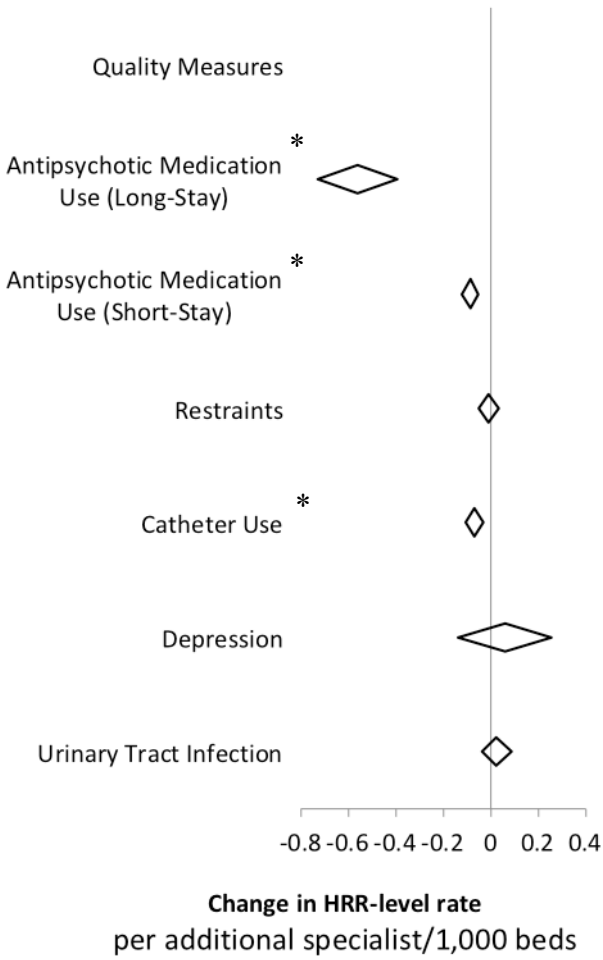

\*P<0.05
