# Supplementary material
Source: PubMed Central journal article supplement (PMC6663630)
Supplement: NIHMS1517522-supplement-Appendix_F2.pdf [file NIHMS1517522-supplement-Appendix_F2.pdf]

Appendix Figure 2: Regional Nursing Home Quality Measure Performance for Six Measures under Prescribing Clinician Control: Advanced Practitioners Subgroup

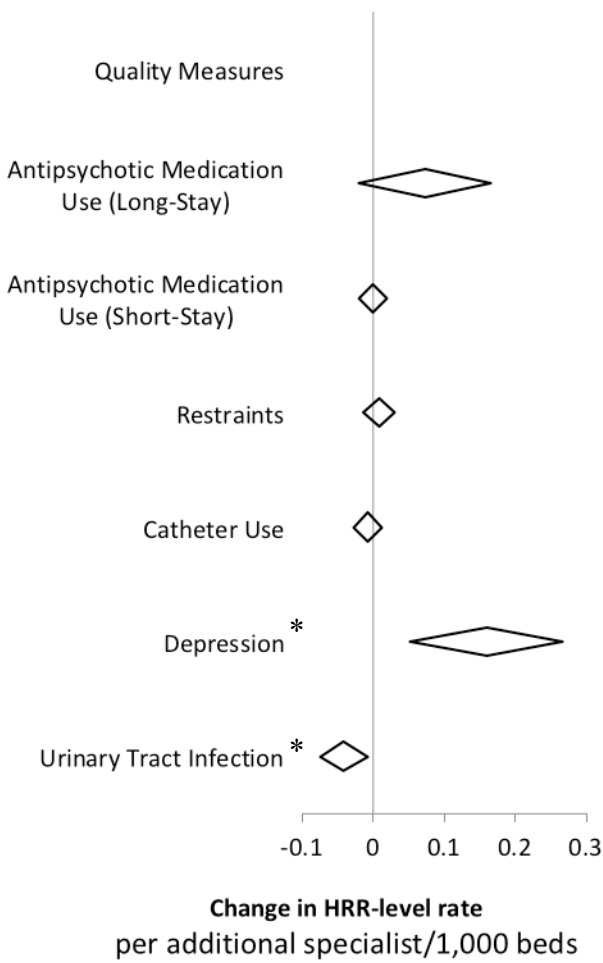

\*P<0.05
