# Supplementary material
Source: PubMed Central journal article supplement (PMC6663630)

Figure 2: Adverse Event Rate per 100 Residents by Level of Nursing Home Clinician Specialization

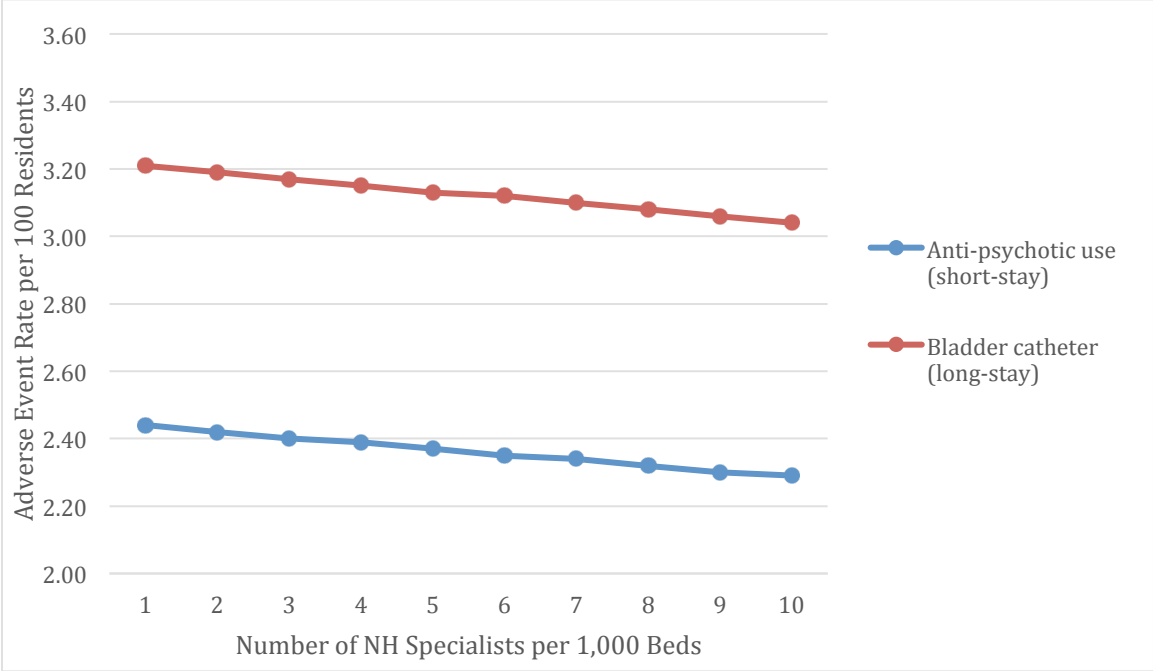

Supplement: NIHMS1517522-supplement-F2.pdf [file NIHMS1517522-supplement-F2.pdf]
